# Supplementary material
Source: MDPI journal article supplement (https://www.mdpi.com/2409-515X/9/4/53)
Supplement: s1 [file s1]

**Table S1.** Caregiver survey, featuring questions and answer choices.

| Question |                                                                                                                                       | Answer Choices                                                                                                                                                                                                              |                                                                                                                                                                                                                                                                                                                                |                                 |           |   |    |  |
|----------|---------------------------------------------------------------------------------------------------------------------------------------|-----------------------------------------------------------------------------------------------------------------------------------------------------------------------------------------------------------------------------|--------------------------------------------------------------------------------------------------------------------------------------------------------------------------------------------------------------------------------------------------------------------------------------------------------------------------------|---------------------------------|-----------|---|----|--|
| 1.       | How old are you (parent)?                                                                                                             |                                                                                                                                                                                                                             |                                                                                                                                                                                                                                                                                                                                |                                 |           |   |    |  |
| 2.       | What is your marital status?                                                                                                          | Single, never married                                                                                                                                                                                                       |                                                                                                                                                                                                                                                                                                                                | Married or domestic partnership |           |   |    |  |
|          |                                                                                                                                       | Widowed                                                                                                                                                                                                                     |                                                                                                                                                                                                                                                                                                                                | Divorced                        | Separated |   |    |  |
| 3.       | How many children do you have?                                                                                                        | 1                                                                                                                                                                                                                           | 2                                                                                                                                                                                                                                                                                                                              | 3                               | 4         | 5 | >5 |  |
| 4.       | How many children do you have that are affected with VLCADD?                                                                          | 1                                                                                                                                                                                                                           | 2                                                                                                                                                                                                                                                                                                                              | 3                               | 4         | 5 | >5 |  |
| 5.       | My child's/children/s VLCADD is difficult to manage                                                                                   | Strongly Disagree (Not difficult at all)<br>Disagree<br>Neither Agree nor Disagree<br>Agree<br>Strongly Agree (Very difficult)                                                                                              |                                                                                                                                                                                                                                                                                                                                |                                 |           |   |    |  |
| 6.       | Circle all that apply. VLCADD impacts my family's ability to access care by:                                                          | Causing financial constraints<br>Limiting access to proper nutrition<br>Increasing emotional stress<br>Impacting ability to work<br>Does not impact daily life                                                              |                                                                                                                                                                                                                                                                                                                                |                                 |           |   |    |  |
| 7.       | Does insurance cover the care needed for your child's/children's VLCADD?                                                              | Yes                                                                                                                                                                                                                         | No                                                                                                                                                                                                                                                                                                                             | Other:                          |           |   |    |  |
| 8.       | What recommendations have been made for your child/children for their condition by their metabolic specialist? Circle all that apply. | d.                                                                                                                                                                                                                          | a. Avoid fasting<br>b. Increased meal frequency<br>c. Avoid prolonged exercise<br>Use a fatty acid supplement (MCT oil, L-carnitine, or other fatty acid supplement)<br>e. Use a carbohydrate supplement<br>f. Follow a low-fat diet<br>g. Follow a high carbohydrate diet<br>h. Multi-vitamin/mineral supplement<br>i. Other: |                                 |           |   |    |  |
| 9.       | What of the current recommendations are you following for your child's/children's condition?                                          | d.                                                                                                                                                                                                                          | a. Avoid fasting<br>b. Increased meal frequency<br>c. Avoid prolonged exercise<br>Use a fatty acid supplement (MCT oil, L-carnitine, or other fatty acid supplement)<br>e. Use a carbohydrate supplement<br>f. Follow a low-fat diet<br>g. Follow a high carbohydrate diet<br>h. Multi-vitamin/mineral supplement<br>i. Other: |                                 |           |   |    |  |
| 10.      | How often do you receive services from a metabolic genetics provider?                                                                 | "As often as recommended by the provider - if they answer this, then how often?<br>Only if my child gets sick/hospitalized<br>Based on nutritional needs<br>When I remember<br>My child does not see a metabolic provider " |                                                                                                                                                                                                                                                                                                                                |                                 |           |   |    |  |
| 11.      | Does your child's/children's daycare or school have a specific plan for your child's VLCADD?                                          | Yes<br>If yes, is it a 504 plan? <sup>1</sup>                                                                                                                                                                               |                                                                                                                                                                                                                                                                                                                                |                                 |           |   |    |  |

|     |                                                                            | If no, what is it? |                |
|-----|----------------------------------------------------------------------------|--------------------|----------------|
|     |                                                                            | No                 | Not Applicable |
| 12. | Does the school have a dietary plan recommended by the specialist?         | Yes                | No             |
| 13. | Is the child's/children's pediatrician made aware of the VLCADD diagnosis? | Yes                | No             |
| 14. | Open-ended—Is there anything else you would like to add?                   |                    |                |

<sup>1</sup>A 504 plan is a document describing changes or modifications that a student may need in school.
